# Supplementary material for: Genetic variation in GNB5 causes bradycardia by augmenting the cholinergic response via increased acetylcholine-activated potassium current (IK,ACh)
Source: PubMed Central journal article supplement (PMC6679373; doi:10.1242/dmm.037994), 2019-07-09
Supplement: dmm-12-037994-s1.pdf [file dmm-12-037994-s1.pdf]

## SUPPLEMENTARY INFORMATION

### Supplementary Figures

**Figure S1. Generation of genome-edited hiPSC lines.** **A**, Using CRISPR/Cas9 technology, the c.242C>T p.S81L *GNB5* mutation was inserted into a control hiPSC line in heterozygous and homozygous state. **B**, Location of the c.242C>T mutation in the *GNB5* transcript and the surrounding sequence. The gRNA sequence that was used is indicated in blue, the PAM sequence in bold. In the single-stranded oligonucleotide (ssODN) that was applied for homologous recombination the c.242C>T mutation is indicated in red and bold, whereas red and italic indicates the synonymous mutation generating a restriction site used for colony screening. **C**, Sanger sequences of wildtype (upper panel), S81L heterozygous (middle panel) and S81L homozygous (lower panel) clones. **D and E**, Immunocytochemistry of the pluripotency markers OCT4, TRA1-81, NANOG, and SSEA4 in the S81L heterozygous (**D**) and homozygous (**E**) lines. Scale bars are 100  $\mu$ m. **F and G**, Normal karyotypes exhibited by hiPSC lines S81L<sup>het</sup> (**F**) (verified by COBRA-FISH) and S81L<sup>homo</sup> (**G**) (verified by G banding).

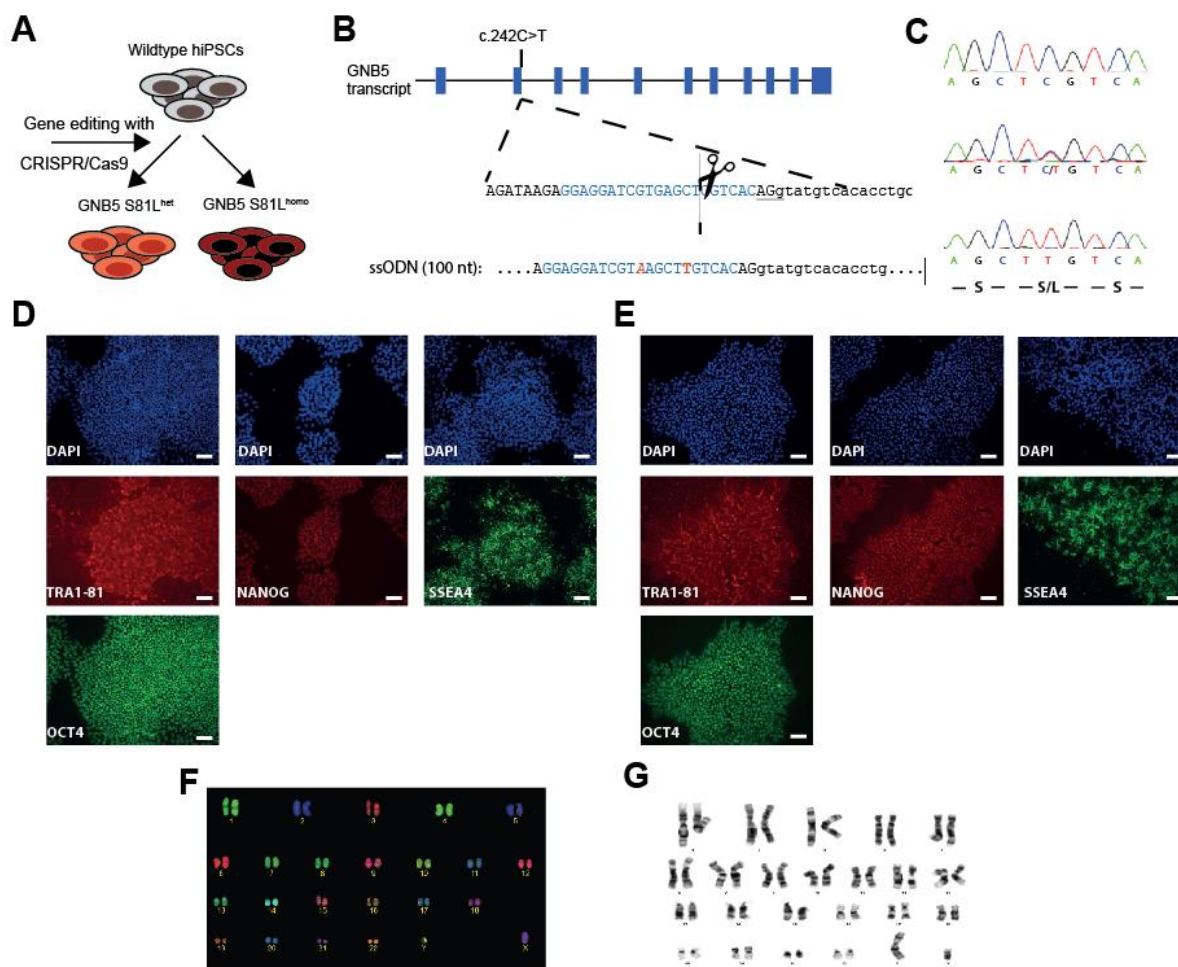

**Figure S2. Action potential (AP) characteristics of retinoic acid (RA) and DMSO-treated hiPSC-CMs.** **A.** Typical example of an action potential when paced at 1 Hz. **B.** Action potential duration at 20%, 50% and 80% of repolarization (APD<sub>20</sub>, APD<sub>50</sub> and APD<sub>80</sub> respectively). In RA-treated hiPSC-CMs, APD is significantly shorter as compared to DMSO-treated hiPSC-CMs (\**P*<0.05, two-sided t-test). **C.** Individual plateau amplitudes, demonstrating lower values in RA-treated hiPSC-CMs in comparison with DMSO-treated hiPSC-CMs (\**P*<0.05, , two-sided t-test) . **D.** Upstroke velocity. **E.** Effects of carbachol (CCh) on maximal diastolic potential (MDP) in DMSO- and RA-treated hiPSC-CMs. While no effect on MDP is found in DMSO-treated hiPSC-CMs, RA-treated hiSPC-CMs display a significant hyperpolarization upon CCh application (\**P*<0.05, paired t-test). B-E. DMSO, n=7; RA, n=17 hiPSC-CMs.

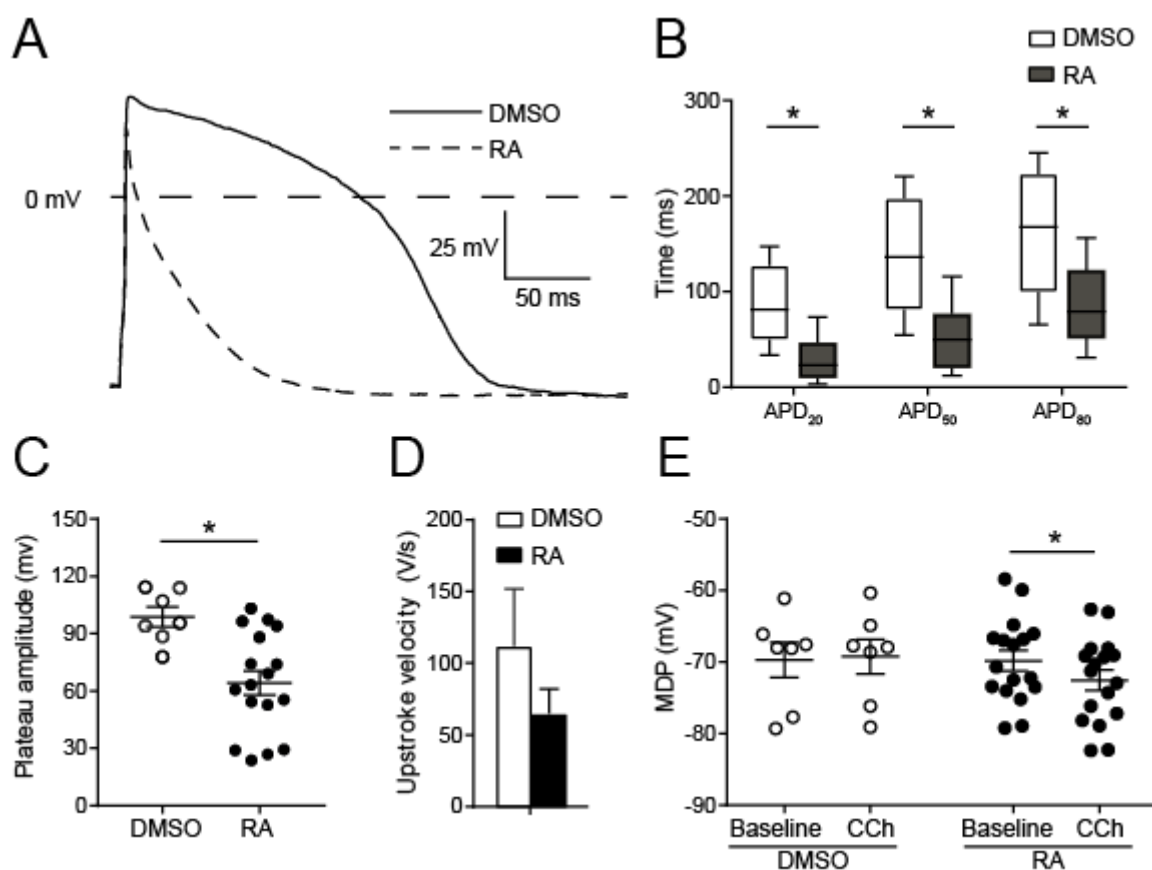

**Figure S3. Expression level of genes *GNB1,2,4* and *TNNT2* as assessed by RT-qPCR in WT, *S81L<sup>het</sup>* and *S81L<sup>homo</sup>* hiPSC-CMs.** Data for each gene are presented as mean $\pm$ s.e.m. of three biological replicas and are normalized to the expression of *TBP*. Quantification is expressed as relative to the expression in the wild type (WT) clone.

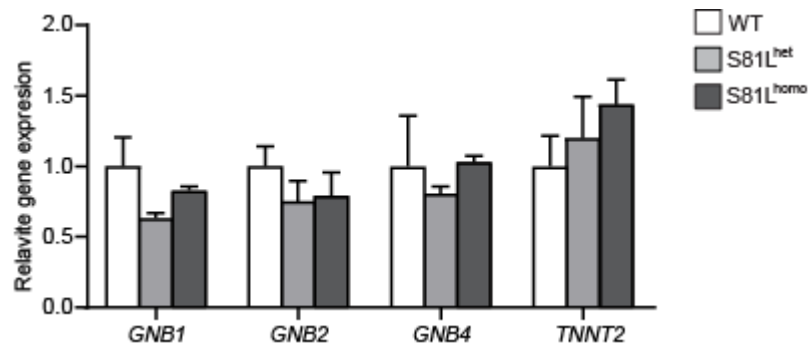

## Supplementary Tables

Table S1. Primer sequences used for PCRs.

| Gene               | Forward 5' to 3'       | Reverse 5' to 3'       |
|--------------------|------------------------|------------------------|
| <i>GNB5-screen</i> | AGCAAGGGGACTGACTATGG   | AAACCCGCTCACCTGTTATG   |
| <i>TBP</i>         | GCTCACCCACCAACAATTTAG  | TCTGCTCTGACTTTAGCACCTG |
| <i>NR2F2</i>       | GCCATAGTCCTGTTACCTCA   | AATCTCGTCGGCTGGTTG     |
| <i>NPPA</i>        | GTCCTTCTCCACCACCAC     | GGGCACGACCTCATCTTCTA   |
| <i>KCNJ3</i>       | ACCTATCCCAGCGAAGCAT    | AAAACGATGACCCCAAAGAA   |
| <i>KCNJ5</i>       | GAGCCCTTTCTGGGAGATGT   | TTTCCAAGGTGAGGACTGGTG  |
| <i>GNB5</i>        | CGTGTCGCCTCTATGACCTG   | CTTTGAGAACATCCCAGACG   |
| <i>RGS6</i>        | AAATCTGGCAAGAGTTTCTGG  | GGGCATAGCTGTCACTCTTCA  |
| <i>GNB5-OT1</i>    | GGTCCCAGGAGAGTTTCTGT   | GCTTTGAGAACGAGGGTGTC   |
| <i>GNB5-OT2</i>    | TGTGGCAAAAACACATAAACG  | CAGCTCCTGGCCTTTGTTA    |
| <i>GNB5-OT3</i>    | CTCACCCCCAGCCTTAGA     | AGAGGCTGGGCTTTTGCTAT   |
| <i>GNB1</i>        | GACCGGGCAGGTGTCTTG     | GTTCCAGATCTTGAGGAAGCTA |
| <i>GNB2*</i>       | AGATCACAGCTGGGCTG      | GATGAGCTTCCCATCCTGG    |
| <i>GNB3</i>        | GATCTGCTTCTCCCACGAGAG  | GATGCCACACGCTCAGAC     |
| <i>GNB4</i>        | AAAAAGTGGGCGTCTCTTGTTG | CAGCTCACACGGTTGTCATGA  |
| <i>TNNT2</i>       | GACCAGGGCAGAAGAAGATG   | ACTCTCTCTCCATCGGGGAT   |

\*Stallmeyer B, Kuß J, Kotthoff S, Zumhagen S, Vowinkel K, Rinné S, Matschke LA, Friedrich C, Schulze-Bahr E, Rust S, Seebohm G, Decher N, Schulze-Bahr E. (2017). A Mutation in the G-Protein Gene *GNB2* Causes Familial Sinus Node and Atrioventricular Conduction Dysfunction. *Circ. Res.* 120(10):e33-e44.

**Table S2. Antibodies used for immunocytochemistry.**

| <b>Primary Antibodies</b>   |                                 |                          |                    |                 |                        |
|-----------------------------|---------------------------------|--------------------------|--------------------|-----------------|------------------------|
| <b>Antigen</b>              | <b>Isotype</b>                  | <b>Supplier</b>          | <b>Cat. Number</b> | <b>Dilution</b> | <b>Citation (PMID)</b> |
| OCT3/4                      | Mouse IgG2b                     | Santa Cruz Biotechnology | sc-5279            | 1:100           | 30778227               |
| TRA 1-81                    | Mouse IgM                       | Abcam                    | ab 16289           | 1:67            | 28344003               |
| SSEA-4                      | Mouse Ig3                       | Santa Cruz Biotechnology | sc-59368           | 1:100           | 29030611               |
| NANOG                       | Goat IgG                        | R&D Systems              | AF 1997            | 1:33            | 23910086               |
| <b>Secondary Antibodies</b> |                                 |                          |                    |                 |                        |
| <b>Host species</b>         | <b>Antigen</b>                  | <b>Supplier</b>          | <b>Cat. Number</b> | <b>Dilution</b> | <b>Fluorophore</b>     |
| Goat                        | Anti-mouse IgG2b                | ThermoFisher Scientific  | A-21141            | 1:500           | AF488                  |
| Goat                        | Anti-mouse IgM                  | ThermoFisher Scientific  | A-21426            | 1:500           | AF555                  |
| Goat                        | Anti-mouse IgG <sub>(H+L)</sub> | ThermoFisher Scientific  | A-11001            | 1:500           | AF488                  |
| Donkey                      | Anti-goat IgG <sub>(H+L)</sub>  | ThermoFisher Scientific  | A-11057            | 1:500           | AF568                  |

**Table S3. Putative genomic off-target sites for the gRNA used to introduce mutation p.S81L in *GNB5*.**

| Location                     | Genomic sequence                                          | Mismatches | Strand | Type     |
|------------------------------|-----------------------------------------------------------|------------|--------|----------|
| <u>15:52153939-52153961</u>  | GAGGATCGTGAGCTCGTCAC <i>AGG</i>                           |            |        |          |
| <u>22:19979742-19979764</u>  | GAGG <b>TC</b> CGTGAGCT <b>T</b> GTCAC <i>TGG</i>         | 3          | -      | Exonic   |
| <u>16:77913475-77913497</u>  | GAGGATCG <b>A</b> GAGCT <b>G</b> A TCAC <i>TGG</i>        | 3          | -      | Intronic |
| <u>1:160408628-160408650</u> | GAGGAT <b>G</b> GTGAGCTC <b>A</b> T <b>T</b> C <i>TGG</i> | 3          | +      | Intronic |

Original gRNA: first row. Sequence in italics depicts the PAM site (NGG), in bold and red the mismatches with the original gRNA.

**Table S4. Action potential (AP) parameters in WT, S81L<sup>het</sup> and S81L<sup>homo</sup> at baseline in spontaneously fast beating (>1 Hz) hiPSC-CMs.**

|                             | WT<br>(n=12) | S81L <sup>het</sup><br>(n=10) | S81L <sup>homo</sup><br>(n=13) |
|-----------------------------|--------------|-------------------------------|--------------------------------|
| MDP (mV)                    | -68.5±0.6    | -69.3±1.3                     | -70.2±1.8                      |
| APA (mV)                    | 94.7±4.6     | 86.5±4.9                      | 85.6±4.9                       |
| V <sub>max</sub> (V/s)      | 40.9±9.9     | 28.3±8.2                      | 32.9±8.9                       |
| APD <sub>20</sub> (ms)      | 45.3±5.7     | 49.4±12.7                     | 39.0±4.4                       |
| APD <sub>50</sub> (ms)      | 81.5±9.7     | 82.4±19.2                     | 66.6±6.5                       |
| APD <sub>80</sub> (ms)      | 109.0±12.6   | 103.8±19.5                    | 88.8±8.4                       |
| APA <sub>plateau</sub> (mV) | 86.1±4.8     | 75.0±7.7                      | 77.9±5.5                       |

Data are mean±s.e.m., MDP, maximal diastolic potential; APA, AP amplitude; V<sub>max</sub>, maximal upstroke velocity; APD<sub>20</sub>, APD<sub>50</sub>, APD<sub>80</sub>, AP duration at 20, 50, and 80% of repolarization, respectively; APA<sub>plateau</sub>, AP plateau amplitude.
